# Supplementary material for: From Adsorbent to Photocatalyst: The Sensitization Effect of SnO2 Surface towards Dye Photodecomposition
Source: MDPI journal article supplement (doi:10.3390/molecules26237123), 2021-11-25
Supplement: s1 [file s1]

# From adsorbent to photocatalyst: the sensitization effect of SnO<sub>2</sub> surface towards dye photodecomposition

Kinga Michalec\* and Anna Kusior

Faculty of Materials Science and Ceramics, AGH University of Science and Technology, al. Mickiewicza 30, 30-059 Kraków, Poland

\* Correspondence: kmichalec@agh.edu.pl

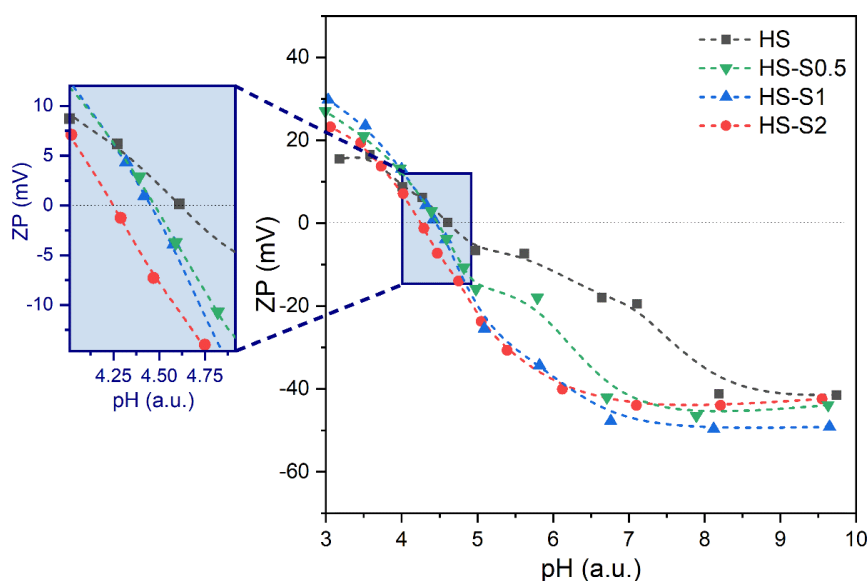

**Figure S1.** Zeta potential (ZP) of the analyzed samples (HS, HS-S0.5, HS-S1, and HS-S2) in aqueous solutions as a function of pH.

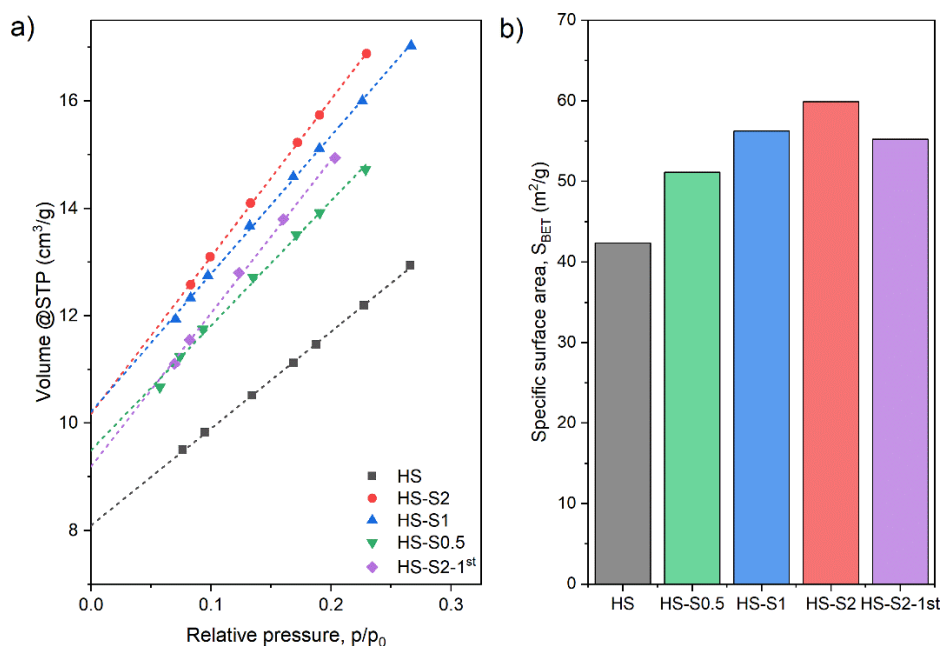

**Figure S2.** (a) BET surface area plots, (b) chart representing the obtained specific surface area values (HS-S2-1<sup>st</sup> – a sample collected after the first cycle of IC photodecomposition).

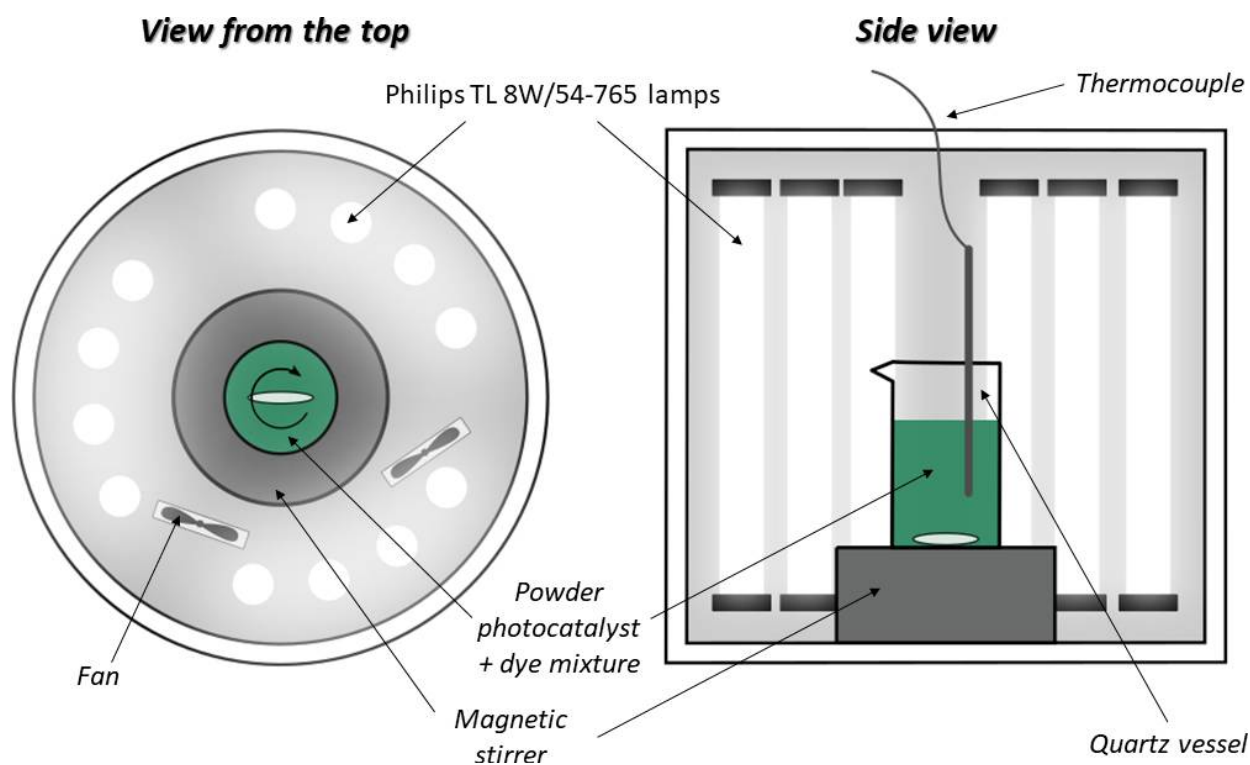

**Figure S3.** Schematic representation of the experimental setup for adsorption/photocatalytic measurements (for adsorption tests, the light was turned off).

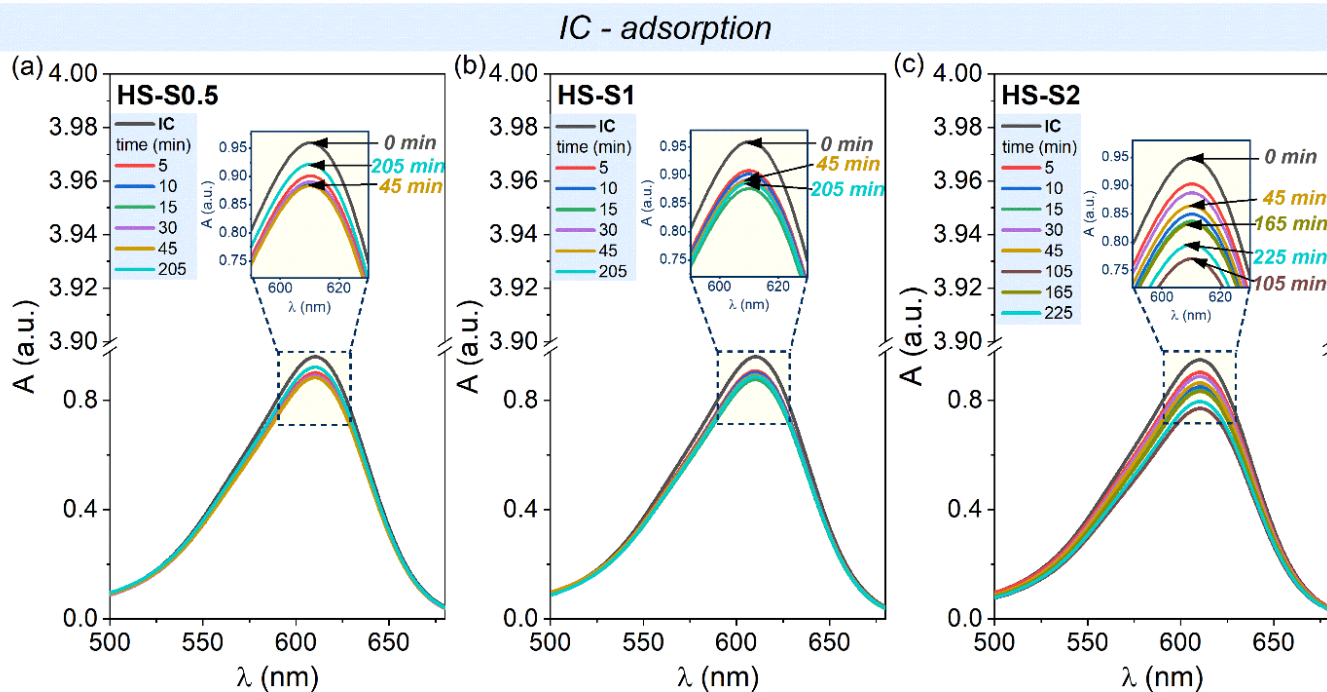

**Figure S4.** Changes in the absorbance of indigo carmine (IC) solutions collected after various time intervals during adsorption tests for: (a) HS-S0.5, (b) HS-S1, (c) HS-S2.

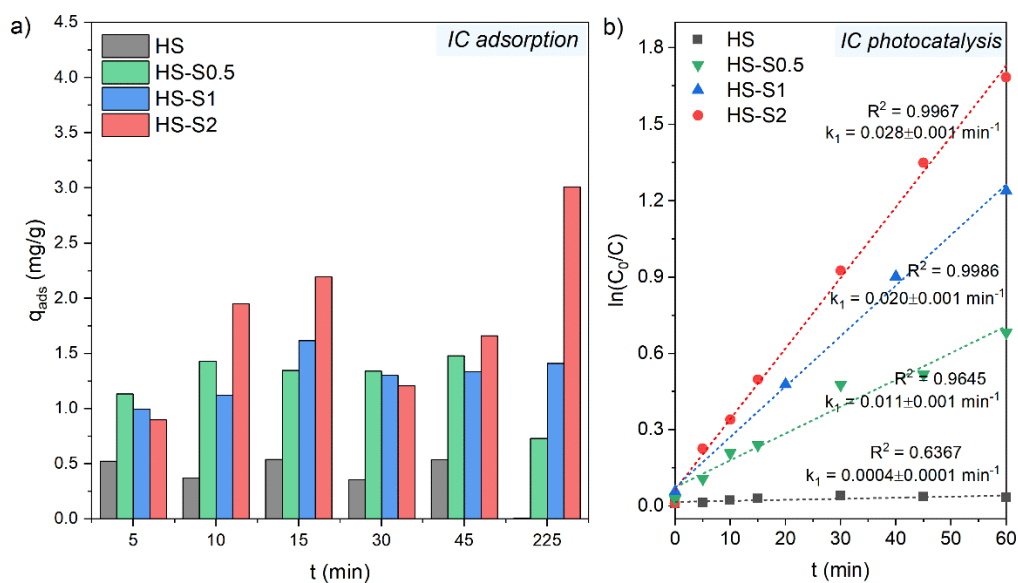

**Figure S5.** (a) Chart representing the changes in the amount of the adsorbed dye ( $q_{ads}$ ) after different periods of time, (b) pseudo-first-order kinetic plots for the IC decomposition.

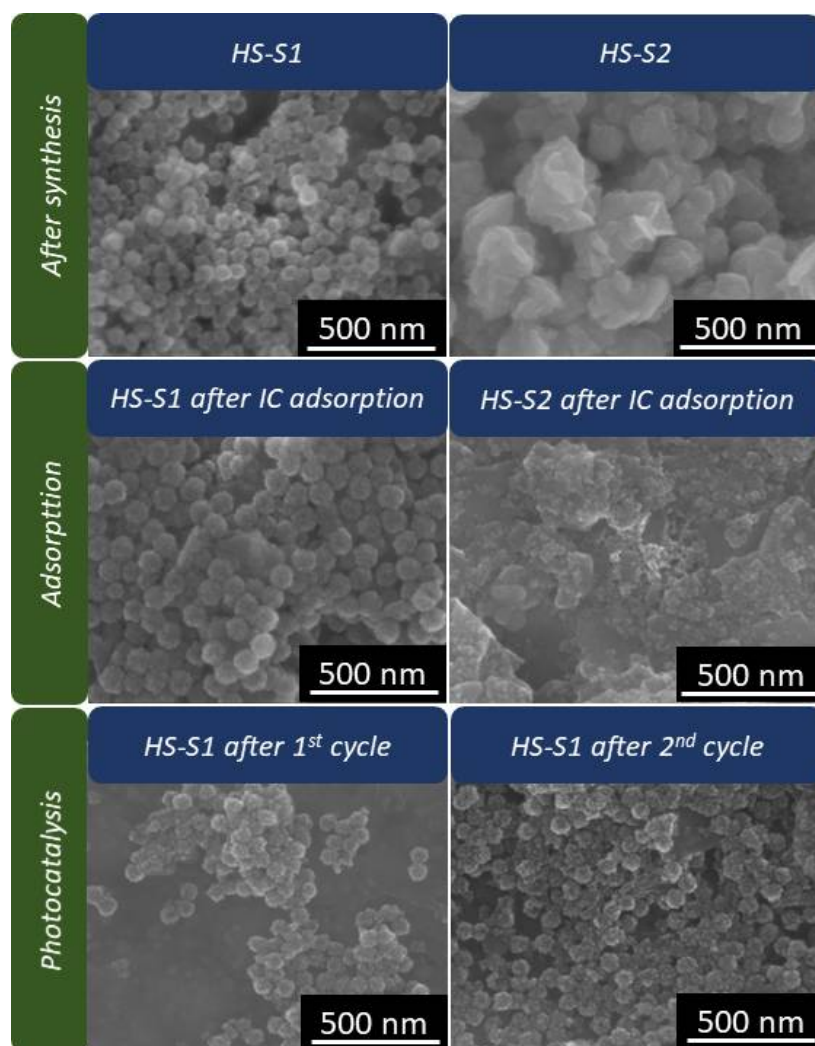

**Figure S6.** SEM images representing the as-synthesized HS-S1 and HS-S2 samples, the powders collected after 45 min of indigo carmine (IC) adsorption process (HS-S1, HS-S2), and HS-S1 collected after the first/second cycle of IC photodecomposition.

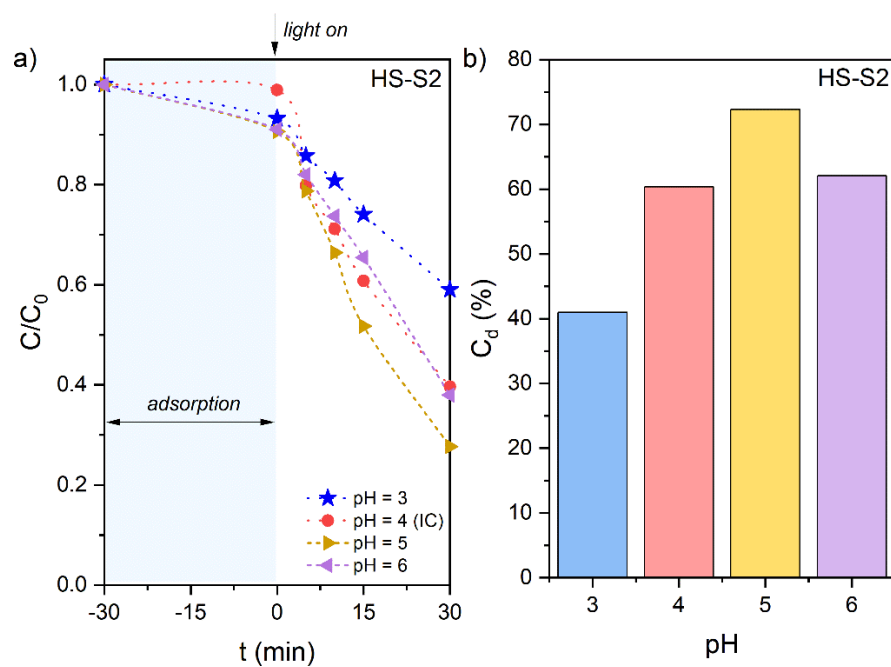

**Figure S7.** The effect of solution pH on the photocatalytic performance of HS-S2 S2 ( $C_d$  – the amount of decomposed dye).
